# Supplementary material for: Challenges in returning results in a genomic medicine implementation study: the Return of Actionable Variants Empirical (RAVE) study
Source: PubMed Central journal article supplement (PMC7198538; doi:10.1038/s41525-020-0127-2), 2020-05-04
Supplement: 41525_2020_127_MOESM2_ESM.pdf [file 41525_2020_127_MOESM2_ESM.pdf]

## Supplementary Material

| <b>Supplementary Table 1. eMERGEseq consensus gene list</b>                                                                                                    |                                                                                                |                                                                  |
|----------------------------------------------------------------------------------------------------------------------------------------------------------------|------------------------------------------------------------------------------------------------|------------------------------------------------------------------|
| <b>Category</b>                                                                                                                                                | <b>Phenotype</b>                                                                               | <b>Gene/genes</b>                                                |
| <b>Cardiovascular</b>                                                                                                                                          | Ehlers-Danlos syndrome, vascular type                                                          | <i>COL3A1, COL5A1</i>                                            |
|                                                                                                                                                                | Marfan syndrome, Loeys-Dietz syndromes, and familial thoracic aortic aneurysms and dissections | <i>FBNI, TGFBR1, TGFBR2, SMAD3, ACTA2, MYH1, MYLK</i>            |
|                                                                                                                                                                | Hypertrophic cardiomyopathy                                                                    | <i>MYBPC3, MYH7, TNNT2, TNNI3, TPM, MYL3, ACTC1, PRKAG2, GLA</i> |
|                                                                                                                                                                | Dilated cardiomyopathy                                                                         | <i>MYL2, LMNA</i>                                                |
|                                                                                                                                                                | Catecholaminergic polymorphic ventricular tachycardia                                          | <i>RYR2</i>                                                      |
|                                                                                                                                                                | Arrhythmogenic right ventricular cardiomyopathy                                                | <i>PKP2, DSP, DSC2, TMEM43, DSG2</i>                             |
|                                                                                                                                                                | Romano-Ward long-QT syndrome types 1, 2, and 3, Brugada syndrome                               | <i>KCNQ1, KCNH2, SCN5A, KCNJ2, KCNE1</i>                         |
|                                                                                                                                                                | Familial hypercholesterolemia                                                                  | <i>LDLR, APOB, PCSK9</i>                                         |
|                                                                                                                                                                | Diabetes                                                                                       | <i>HNF1A, HNF1B</i>                                              |
|                                                                                                                                                                | <b>Cancer</b>                                                                                  | Hereditary breast and ovarian cancer                             |
| Li-Fraumeni syndrome                                                                                                                                           |                                                                                                | <i>TP53</i>                                                      |
| Peutz-Jeghers syndrome                                                                                                                                         |                                                                                                | <i>STK11</i>                                                     |
| Lynch syndrome                                                                                                                                                 |                                                                                                | <i>MLH1, MSH2, MSH6, PMS2, POLD1, POLE</i>                       |
| Familial adenomatous polyposis                                                                                                                                 |                                                                                                | <i>APC</i>                                                       |
| <i>MYH</i> -associated polyposis; adenomas, multiple colorectal, <i>FAP</i> type 2; colorectal adenomatous polyposis, autosomal recessive, with pilomatricomas |                                                                                                | <i>MUTYH</i>                                                     |
| Juvenile polyposis                                                                                                                                             |                                                                                                | <i>BMPRIA, SMAD4</i>                                             |
| Von Hippel–Lindau syndrome                                                                                                                                     |                                                                                                | <i>VHL</i>                                                       |
| Multiple endocrine neoplasia type 1                                                                                                                            |                                                                                                | <i>MEN1</i>                                                      |
| Multiple endocrine neoplasia type 2                                                                                                                            |                                                                                                | <i>RET</i>                                                       |
| Familial medullary thyroid cancer <sup>d</sup>                                                                                                                 |                                                                                                | <i>RET</i>                                                       |
| <i>PTEN</i> hamartoma tumor syndrome                                                                                                                           |                                                                                                | <i>PTEN</i>                                                      |
| Retinoblastoma                                                                                                                                                 |                                                                                                | <i>RBI</i>                                                       |
| Hereditary paraganglioma-pheochromocytoma syndrome                                                                                                             | <i>SDHD, SDHAF2, SDHC, SDHB</i>                                                                |                                                                  |
| <b>Other</b>                                                                                                                                                   | Tuberous sclerosis complex                                                                     | <i>TSC1, TSC2</i>                                                |

|  |                                       |                               |
|--|---------------------------------------|-------------------------------|
|  | WT1-related Wilms tumor               | <i>WT1</i>                    |
|  | Neurofibromatosis type 2              | <i>NF2</i>                    |
|  | Wilson disease                        | <i>ATP7B</i>                  |
|  | Ornithine transcarbamylase deficiency | <i>OTC</i>                    |
|  | Neuromuscular disorders               | <i>RYR1, CACNA1A, CACNAIS</i> |

**Supplementary Table 2.** Consensus list of actionable single nucleotide variants to be returned.

| rs#         | Gene           | Associated Disease                                    | Disease Category           |
|-------------|----------------|-------------------------------------------------------|----------------------------|
| rs77931234  | <i>ACADM</i>   | Medium-chain acyl-CoA dehydrogenase (MCAD) deficiency | Inborn error of metabolism |
| rs387906225 | <i>ALDOB</i>   | Hereditary fructose intolerance                       | Inborn error of metabolism |
| rs386834233 | <i>BCKDHB</i>  | Maple syrup urine disease                             | Inborn error of metabolism |
| rs79761867  | <i>BCKDHB</i>  | Maple syrup urine disease                             | Inborn error of metabolism |
| rs80338898  | <i>FAH</i>     | Tyrosinemia type I                                    | Inborn error of metabolism |
| rs1801175   | <i>G6PC</i>    | Glycogen storage disease type I                       | Inborn error of metabolism |
| rs397509431 | <i>CPT2</i>    | Carnitine palmitoyltransferase II (CPT II) deficiency | Inborn error of metabolism |
| rs113993962 | <i>BLM</i>     | Bloom Syndrome                                        | Cancer susceptibility      |
| rs193922376 | <i>MSH2</i>    | Lynch syndrome <sup>#</sup>                           | Cancer susceptibility      |
| rs6467      | <i>CYP21A2</i> | 21-hydroxylase deficiency                             | Endocrinology              |
| rs6025      | <i>F5</i>      | factor V Leiden thrombophilia <sup>*</sup>            | Thrombophilia              |
| rs1800562   | <i>HFE</i>     | Hereditary hemochromatosis                            | Iron storage               |
| rs28940579  | <i>MEFV</i>    | Familial Mediterranean fever                          | Inflammatory               |
| rs61752717  | <i>MEFV</i>    | Familial Mediterranean fever                          | Inflammatory               |

Only bi-allelic (homozygous, or if applicable compound heterozygous) variants were returned. Mode of inheritance is autosomal recessive except <sup>#</sup>=autosomal dominant and <sup>\*</sup>=risk increased.
